# Supplementary material for: Chaperone-E3 Ligase Complex HSP70-CHIP Mediates Ubiquitination of Ribosomal Protein S3
Source: MDPI journal article supplement (doi:10.3390/ijms19092723), 2018-09-12
Supplement: s1 [file s1]

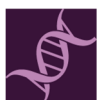

Article

# Chaperone-E3 ligase complex HSP70/CHIP mediates ubiquitination of ribosomal protein S3

Inwoo Hwang <sup>1,2</sup>, Sung-Woo Cho <sup>4</sup> and Jee-Yin Ahn <sup>1,2,3\*</sup>

<sup>1</sup> Department of Molecular Cell Biology, Sungkyunkwan University School of Medicine, Suwon 16419, Korea; [inwhwang@skku.edu](mailto:inwhwang@skku.edu) (I.H.); [jeeahn@skku.edu](mailto:jeeahn@skku.edu) (J.Y.A.)

<sup>2</sup> Single Cell Network Research Center, Sungkyunkwan University School of Medicine, Suwon 16419, Korea; [inwhwang@skku.edu](mailto:inwhwang@skku.edu) (I.H.); [jeeahn@skku.edu](mailto:jeeahn@skku.edu) (J.Y.A.)

<sup>3</sup> Samsung Biomedical Research Institute, Samsung Medical Center, Seoul, 06351 Korea; [jeeahn@skku.edu](mailto:jeeahn@skku.edu) (J.Y.A.)

<sup>4</sup> Department of Biochemistry and Molecular Biology, University of Ulsan, College of Medicine, Seoul 05505, Korea; [swcho@amc.seoul.kr](mailto:swcho@amc.seoul.kr) (S.W.C.)

\* Correspondence: [jeeahn@skku.edu](mailto:jeeahn@skku.edu); Tel.: +82-31-299-6134; Fax: +82-31-299-6139

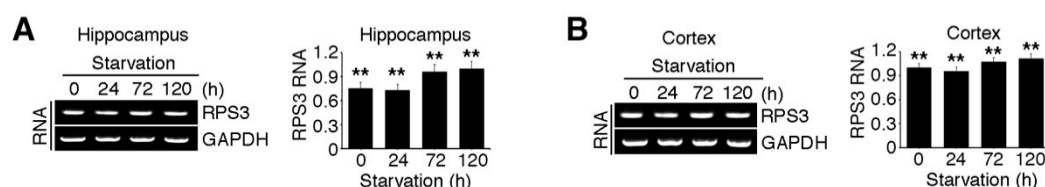

**Figure S1.** RNA expression levels of RPS3 are no significant changed from starved brains. C57BL/6 were subjected to nutrient starvation. The RNA levels of RPS3 were measured in the (A) hippocampus or (B) cortex by RT-PCR. The expressions were determined by densitometric analysis and its values were normalized with its normal brains (0 h). Statistical significance was calculated using a one-way ANOVA test followed by Turkey's post-test (\*\* $P < 0.001$ ). Values in this figure represent the mean  $\pm$  SEM from three independent experiments and the image shown is representative of at least three independent experiments.

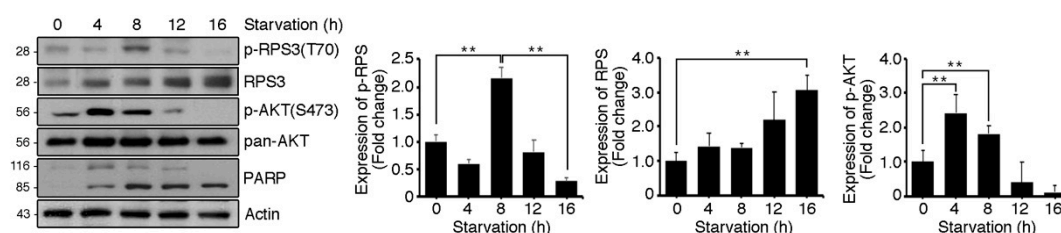

**Figure S2.** Endogenous expression levels of RPS3, p-RPS3, AKT, p-AKT or PARP were measured for time interval 0, 4, 8, 12 or 16 hr after FBS serum starvation in HEK 293T cells by immunoblotting with indicating antibodies. Protein expression of p-RPS3 (left), RPS3 (middle) and p-AKT (right) were determined by densitometric analysis and its values were normalized with actin. Statistical significance was calculated using a one-way ANOVA test followed by Turkey's post-test (\*\* $P < 0.001$ ). Values in this figure represent the mean  $\pm$  SEM from three independent experiments, and the image shown is representative of at least three independent experiments.

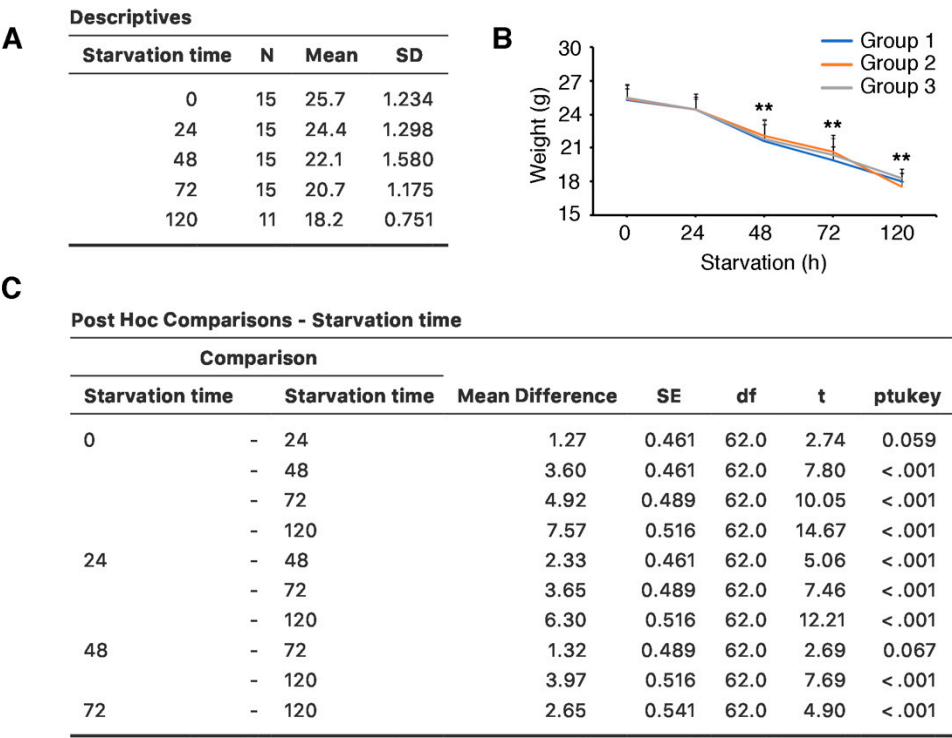

**Figure S3.** Six- to eight-week old C57BL/6 male mice (Orient Bio) were fasting treatment. The mice (total number=60) were subdivided into 4 groups with starvation time, observing their weight and general health condition. During fasting treatment, 4 mice were sacrificed by following ethics guide line. (A) The average weights of mice were calculated by grouping starvation time using a one-way ANOVA test and (B) the graph was showed its weight curve. (C) Body weights were calculated using one-way ANOVA test followed by Turkey's post-test (\*\*P < 0.001).

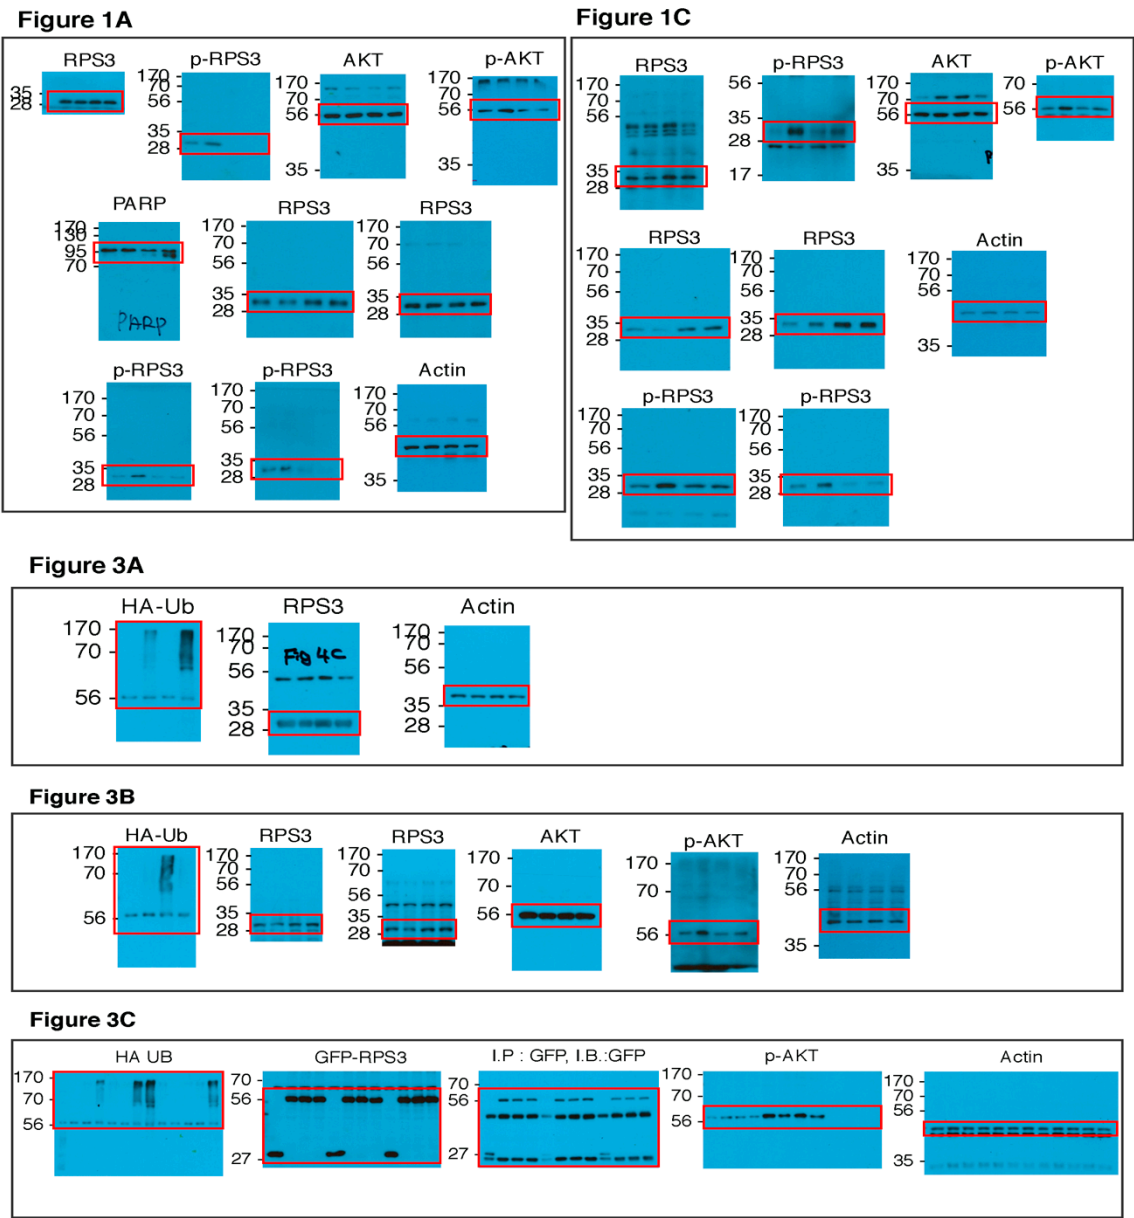

**Figure S4.** Unprocessed original scans of Western blot analysis in the indicated figures. Scanned film image of Figure 1-3 immunoblotting experiment. Labels on top of each membrane scan indicate the antibody used for detection. Dashed red boxes show the regions that were cropped for the figures. Molecular size markers in kDa.

Figure 4C

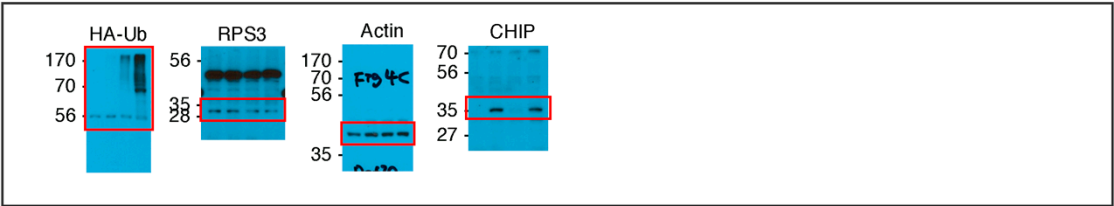

Figure 4E

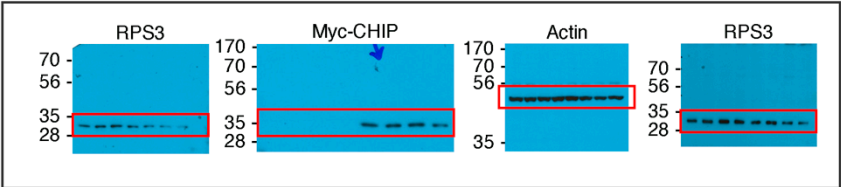

Figure 4D

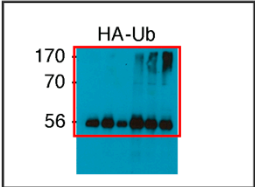

Figure 4G

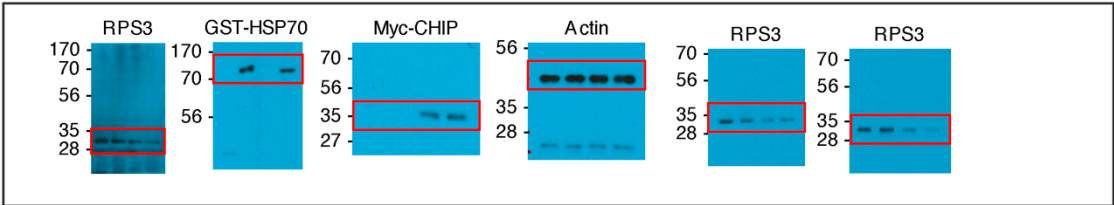

Figure 5A

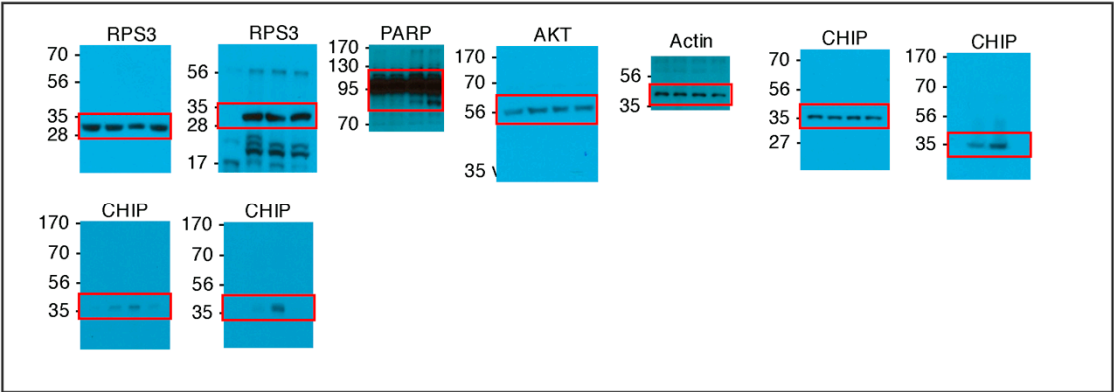

Figure 5B

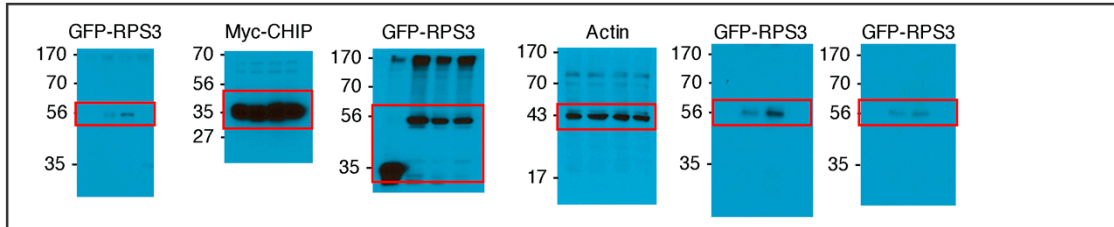

**Figure S5.** Uncropped immunoblots referring to Figure 4-5. Labels on top of each membrane scan indicate the antibody used for detection. The canned images were cropped around the molecular weight of the respective proteins and were presented in the figures. Dashed red boxes show the regions that were cropped for the figures. Molecular size markers in kDa.

Group 1

|                             |                | NUMBER                         | Score | A1-1 | A1-2 | A1-3 | A1-4 | A1-5 | B1-1 | B1-2 | B1-3 | B1-4 | B1-5 | C1-1 | C1-2 | C1-3 | C1-4 | C1-5 | D1-1 | D1-2 | D1-3 | D1-4 | D1-5 |   |
|-----------------------------|----------------|--------------------------------|-------|------|------|------|------|------|------|------|------|------|------|------|------|------|------|------|------|------|------|------|------|---|
|                             |                | Normal                         | 0     | 0    | 0    | 0    | 0    | 0    | 0    | 0    | 0    | 0    | 0    | 0    | 0    | 0    | 0    | 0    | 0    | 0    | 0    | 0    | 0    |   |
| Scoring<br>sheet<br>Group 1 | Weight loss    | 10%~15%                        | 1     |      |      |      |      |      |      |      |      |      |      |      |      |      |      |      |      |      |      |      |      |   |
|                             |                | > 20%                          | 2     |      |      |      |      |      |      |      |      |      |      | 2    | 2    | 2    | 2    |      |      |      |      |      |      |   |
|                             |                |                                | 3     |      |      |      |      |      |      |      |      |      |      |      |      |      |      |      | 3    |      | 3    | 3    | 3    |   |
|                             | Appearance     | Normal                         | 0     | 0    | 0    | 0    | 0    | 0    | 0    | 0    | 0    | 0    | 0    | 0    | 1    | 1    | 0    | 1    | 1    |      | 1    | 1    | 1    |   |
|                             |                | Small change                   | 1     |      |      |      |      |      |      |      |      |      |      |      |      |      |      |      |      |      |      |      |      |   |
|                             |                | Body Temp. 1~2 °C              | 2     |      |      |      |      |      |      |      | 1    |      |      | 1    | 0    | 1    | 1    | 0    | 1    | 1    |      | 1    | 1    | 1 |
|                             |                | Heart beats, breath rates <50% | 1     |      |      |      |      |      |      |      |      |      |      |      |      |      |      |      |      |      |      |      |      |   |
|                             | Body condition | Body Temperature > 2 °C        | 2     |      |      |      |      |      |      |      |      |      |      | 0    | 0    | 0    | 0    | 0    | 1    |      |      | 1    | 1    | 1 |
|                             |                | Heart beats, breath rates >50% | 3     |      |      |      |      |      |      |      |      |      |      |      |      |      |      |      |      |      |      |      |      |   |
|                             |                | BGS 1~2                        | 0     | 0    | 0    | 0    | 0    | 0    | 0    | 0    | 0    | 0    | 0    | 0    | 0    | 0    | 0    | 0    | 1    |      |      |      |      |   |
| BGS 2~3                     |                | 1                              |       |      |      |      |      |      |      |      |      |      |      | 1    | 0    | 0    | 0    | 1    |      |      | 1    | 1    | 1    |   |
|                             | BGS 3~4        | 2                              |       |      |      |      |      |      |      |      |      |      |      |      |      |      |      |      |      |      |      |      |      |   |
|                             | BGS 4~5        | 3                              |       |      |      |      |      |      |      |      |      |      |      |      |      |      |      |      |      |      |      |      |      |   |
|                             |                | Total score                    | 0     | 0    | 0    | 0    | 0    | 0    | 0    | 1    | 0    | 1    | 0    | 4    | 3    | 2    | 3    | 5    |      | 5    | 5    | 5    |      |   |

Group 2

|                          | NUMBER         | Score                           | A2-1 | A2-2 | A2-3 | A2-4 | A2-5 | B2-1 | B2-2 | B2-3 | B2-4 | B2-5 | C2-1 | C2-2 | C2-3 | C2-4 | C2-5 | D2-1 | D2-2 | D2-3 | D2-4 | D2-5 |   |
|--------------------------|----------------|---------------------------------|------|------|------|------|------|------|------|------|------|------|------|------|------|------|------|------|------|------|------|------|---|
|                          |                |                                 | 0    | 0    | 0    | 0    | 0    | 0    | 0    | 0    | 0    | 0    | 0    | 0    | 1    | 1    |      |      |      |      |      |      |   |
| Scoring sheet<br>Group 2 | Weight loss    | Normal                          | 0    |      |      |      |      |      |      |      |      |      |      |      |      |      |      |      |      |      |      |      |   |
|                          |                | 10%                             | 1    |      |      |      |      |      |      |      |      |      |      |      |      |      |      |      |      |      |      |      |   |
|                          |                | 10~15%                          | 2    |      |      |      |      |      |      |      |      |      |      |      |      |      |      |      |      |      |      |      |   |
|                          | Appearance     | > 20%                           | 3    |      |      |      |      |      |      |      |      |      |      |      |      |      |      |      |      |      |      |      |   |
|                          |                | Normal                          | 0    | 0    | 0    | 0    | 0    | 0    | 0    | 0    |      |      |      |      |      | 3    |      | 2    | 3    | 3    | 3    | 3    |   |
|                          |                | Small change                    | 1    |      |      |      |      |      |      |      |      |      |      |      |      |      |      |      |      |      |      |      |   |
|                          |                | Body Temp. 1~2 °C               | 2    |      |      |      |      |      |      |      |      | 1    | 1    | 0    | 0    |      |      |      |      |      |      |      |   |
|                          | Body condition | Heart beats, breath rates < 50% | 1    |      |      |      |      |      |      |      |      |      |      |      |      |      |      |      | 2    |      |      | 1    | 1 |
|                          |                | Body Temperature > 2 °C         | 2    |      |      |      |      |      |      |      |      |      |      |      |      |      |      |      |      |      |      |      | 2 |
|                          |                | Heart beats, breath rates > 50% | 3    |      |      |      |      |      |      |      |      |      |      |      |      |      |      |      |      |      |      |      |   |
| Body condition           |                | BGS 1-3                         | 1    | 0    | 0    | 0    | 0    | 0    | 0    | 0    | 0    | 0    | 0    | 0    | 0    | 0    | 1    | 0    |      |      | 1    | 1    | 1 |
|                          | BGS 1-1        | 2                               |      |      |      |      |      |      |      |      |      |      |      |      |      |      |      |      |      |      |      |      |   |
|                          | BGS 1-2        | 3                               |      |      |      |      |      |      |      |      |      |      |      |      |      |      |      |      |      |      |      |      |   |
|                          | BGS 1-1        | 3                               |      |      |      |      |      |      |      |      |      |      |      |      |      |      |      |      |      |      |      |      |   |
| Total score              |                |                                 | 0    | 0    | 0    | 0    | 0    | 0    | 0    | 1    | 1    | 0    | 1    | 2    | 5    | 3    | 3    | 6    | 4    | 5    | 5    | 7    |   |

Group 3

|                       |                | NUMBER                         | Score | A3-1 | A3-2 | A3-3 | A3-4 | A3-5 | B3-1 | B3-2 | B3-3 | B3-4 | B3-5 | C3-1 | C3-2 | C3-3 | C3-4 | C3-5 | D3-1 | D3-2 | D3-3 | D3-4 | D3-5 |   |
|-----------------------|----------------|--------------------------------|-------|------|------|------|------|------|------|------|------|------|------|------|------|------|------|------|------|------|------|------|------|---|
| Scoring sheet Group 3 | Weight loss    | Normal                         | 0     |      |      | 0    | 0    | 0    | 0    | 0    | 0    | 0    | 0    |      |      |      |      |      |      |      |      |      |      |   |
|                       |                | 10~15%                         | 1     |      |      |      |      |      |      |      |      |      |      |      |      |      |      |      |      |      |      |      |      |   |
|                       |                | 15~20%                         | 2     |      |      |      |      |      |      |      |      |      |      |      |      |      |      |      |      |      |      |      |      |   |
|                       |                | >20%                           | 3     |      |      |      |      |      |      |      |      |      |      |      |      |      |      |      |      |      |      |      |      |   |
|                       | Appearance     | Normal                         | 0     | 0    | 0    | 0    | 0    | 0    | 0    | 1    | 0    | 0    | 0    | 0    |      |      |      | 3    | 2    |      |      | 3    | 3    |   |
|                       |                | Small change                   | 1     |      |      |      |      |      |      |      |      |      |      |      |      |      |      |      |      |      |      |      |      | 3 |
|                       |                | Body Temp. 1~2 °C              | 2     |      |      |      |      |      |      |      |      |      |      |      | 1    | 0    | 1    | 1    | 1    |      | 1    | 1    |      | 1 |
|                       |                | Heart beats, breath rates <50% | 3     |      |      |      |      |      |      |      |      |      |      |      |      |      |      |      |      |      |      |      |      |   |
|                       | Body condition | Heart beats, breath rates <50% | 3     |      |      |      |      |      |      |      |      |      |      |      |      |      |      |      |      |      |      |      |      |   |
|                       |                | BCS 1/2                        | 1     | 0    | 0    | 0    | 0    | 0    | 0    | 0    | 0    | 0    | 0    | 0    | 0    | 0    | 0    | 0    | 0    |      |      |      |      |   |
| BCS 2/3               |                | 1                              |       |      |      |      |      |      |      |      |      |      |      |      |      |      |      |      |      | 1    |      |      | 1    |   |
| BCS 3/4               |                | 2                              |       |      |      |      |      |      |      |      |      |      |      |      |      |      |      |      |      |      | 2    |      |      |   |
|                       | BCS 4/5        | 3                              |       |      |      |      |      |      |      |      |      |      |      |      |      |      |      |      |      |      |      |      |      |   |
| Total score           |                |                                | 0     | 0    | 0    | 0    | 0    | 0    | 1    | 0    | 0    | 0    | 0    | 3    | 2    | 3    | 6    | 3    |      | 5    | 6    |      | 5    |   |

**Table S1.** Mice health monitoring sheet. During fasting treatment, mice were observed weight loss, appearance (small change, body temperature or heart beats) and body condition (BCS rates) every day. Total 60 mice were used for experiments, 20 mice for each experiments and mice (n=4, grey box) were sacrificed, decreasing its body weight more than 20% a day before experimental day.
